# Supplementary material for: Genetic differentiation and phylogeography of Mediterranean-North Eastern Atlantic blue shark (Prionace glauca, L. 1758) using mitochondrial DNA: panmixia or complex stock structure?
Source: PubMed Central journal article supplement (PMC5723133; doi:10.7717/peerj.4112), 2017-12-06
Supplement: peerj-05-4112-s003.pdf [file peerj-05-4112-s003.pdf]

- 0.0 THYR005
- 0.0 BALE001
- 0.0 MUA048
- 0.0 BALE042
- 0.0 IIGU027
- 0.0 THYR001
- 0.0 IONI023
- 0.0 EATL025
- 0.0 IIGU036
- 0.0 IIGU045
- 0.0 IIGU059
- 0.0 EATL057
- 0.0 BALE051
- 0.0 BALE011
- 0.0 BALE030
- 0.0 IIGU055
- 0.0 THYR010
- 0.0 IIGU035
- 0.0 IIGU056
- 0.0 EATL002
- 0.0 IONI024
- 0.0 CADR002
- 0.0 BALE050
- 0.0 BALE007
- 0.0 BALE008
- 0.0 IIGU010
- 0.0 BALE006
- 0.0 BALE002
- 0.0 CADR015
- 0.0 EATL066
- 0.0 BALE047
- 0.0 CADR007
- 0.0 IIGU018
- 0.0 BALE045
- 0.0 IIGU005
- 0.0 IIGU052
- 0.0 IONI013
- 0.0 BALE014
- 0.0 BALE037
- 0.0 IONI015
- 0.0 BALE041
- 0.0 IIGU058
- 0.0 IIGU053
- 0.0 THYR008
- 0.0 BALE040
- 0.0 CADR020
- 0.0 EATL020
- 0.0 IONI022
- 0.0 CADR017
- 0.0 IONI019
- 0.0 BALE028
- 0.0 IONI002
- 0.99 IONI002
- 0.0 CADR013
- 0.0 THYR006
- 0.0 IONI018
- 0.0 IIGU032
- 0.0 BALE014
- 0.0 IIGU041
- 0.0 BALE044
- 0.0 THYR003
- 0.0 EATL025
- 0.0 IIGU011
- 0.0 BALE049
- 0.0 BALE026
- 0.0 BALE046
- 0.0 CADR019
- 0.0 BALE001
- 0.0 IIGU005
- 0.0 IIGU049
- 0.24 BALE049
- 0.0 BALE052
- 0.91 BALE016
- 0.36 BALE038
- 0.0 IONI020
- 0.0 BALE035
- 0.0 BALE033
- 0.0 CADR008
- 0.0 IONI016
- 0.0 IIGU054
- 0.0 BALE010
- 0.0 IONI014
- 0.0 BALE009
- 0.0 IIGU026
- 0.0 IIGU038
- 0.0 IIGU051
- 0.0 BALEGEL14
- 0.0 THYR009
- 0.0 EATL075
- 0.0 IIGU007
- 0.0 BALE027
- 0.0 BALE039
- 0.0 THYR007
- 0.0 EATL009
- 0.0 IIGU039
- 0.0 BALE010
- 0.0 BALE021
- 0.0 IIGU047
- 0.0 IIGU030
- 0.0 EATL065
- 0.0 CADR011
- 0.0 BALE021
- 0.0 CADR005
- 0.0 BALE009
- 0.0 IIGU046
- 0.95 IIGU046
- 0.0 CADR010
- 0.0 IONI011
- 0.0 THYR002
- 0.0 IIGU057
- 0.0 EATL073
- 0.0 CADR001
- 0.0 IIGU014
- 0.0 CADR004
- 0.0 EATL068
- 0.0 BALE011
- 0.0 CADR016
- 0.0 IIGU033
- 0.0 IIGU031
- 0.0 BALE013
- 0.0 BALE027
- 0.0 CELT019
- 0.0 BALE034
- 0.0 IIGU006
- 0.0 BALE029
- 0.0 CELT004
- 0.02 EATL054
- 0.0 BALE006
- 0.0 CELT022
- 0.0 CELT002
- 0.0 EATL069
- 0.0 BALE031
- 0.39 IIGU031
- 0.0 EATL023
- 0.0 CELT003
- 0.0 CELT007
- 0.0 IIGU002
- 0.0 EATL067
- 0.05 IIGU002
- 0.0 EATL059
- 0.33 IIGU002
- 0.0 BALE007
- 0.0 IIGU013
- 0.0 BALE004
- 0.0 CADR006
- 0.0 EATL022
- 0.0 IIGU050
- 0.0 IIGU004
- 0.0 IIGU012
- 0.03 IIGU012
- 0.0 IIGU021
- 0.33 IIGU021
- 0.0 IIGU043
- 0.0 EATL019
- 0.0 IIGU025
- 0.0 CELT021
- 0.0 IIGU010
- 0.0 IIGU037
- 0.0 IIGU024
- 0.0 BALE017
- 0.0 IIGU017
- 0.0 EATL074
- 0.0 EATL060
- 0.0 CADR018
- 0.0 CELT020
- 0.099 EATL061
- 0.0 EATL064
- 0.0 EATL076
- 0.0 BALE032
- 0.0 CADR014
- 0.0 IIGU015
- 0.0 IONI017
- 0.0 CELT018
- 0.0 IIGU019
- 0.0 THYR004
- 0.0 IIGU016
- 0.0 BALE043
- 0.0 IIGU001
- 0.05 IIGU001
- 0.0 CELT008
- 0.0 CELT017
- 0.0 IIGU042
- 0.0 BALE036
- 0.0 IIGU009
- 0.0 EATL018
- 0.0 BALE012
- 0.0 CELT001
- 0.04 IIGU020
- 0.0 IIGU029
- 0.03 IIGU018
- 0.03 IIGU055
- 0.0 EATL055
- 0.02 IIGU012
- 0.0 IONI025
- 0.0 EATL058
- 0.0 IIGU034
- 0.0 EATL062
- 0.0 IIGU022
- 0.36 IONI012
- 0.0 CADR003
- 0.0 EATL021
- 0.0 BALE008
- 0.0 IIGU044
- 0.3 EATL071
- 0.0 EATL063
- 0.0 IIGU003
- 0.0 CADR012
- 0.0 BALE004
- 0.0 BALE048
- 0.0 EATL053
- 0.0 EATL056
- 0.07 EATL070
- 0.0 IIGU023
- 0.02 CADR009
- 0.0 EATL072

0  
0.24  
0.51  
0.9  
0.36  
0.95

0.39  
0.62  
0.95  
0.02  
0.85  
0.02  
0.95  
0.1  
0.99  
0.62  
0.95  
0.04  
0.57  
0.39  
0.02  
0.36  
0.04  
0.39  
0.95  
0.04  
0.57

1

1.24

8.98

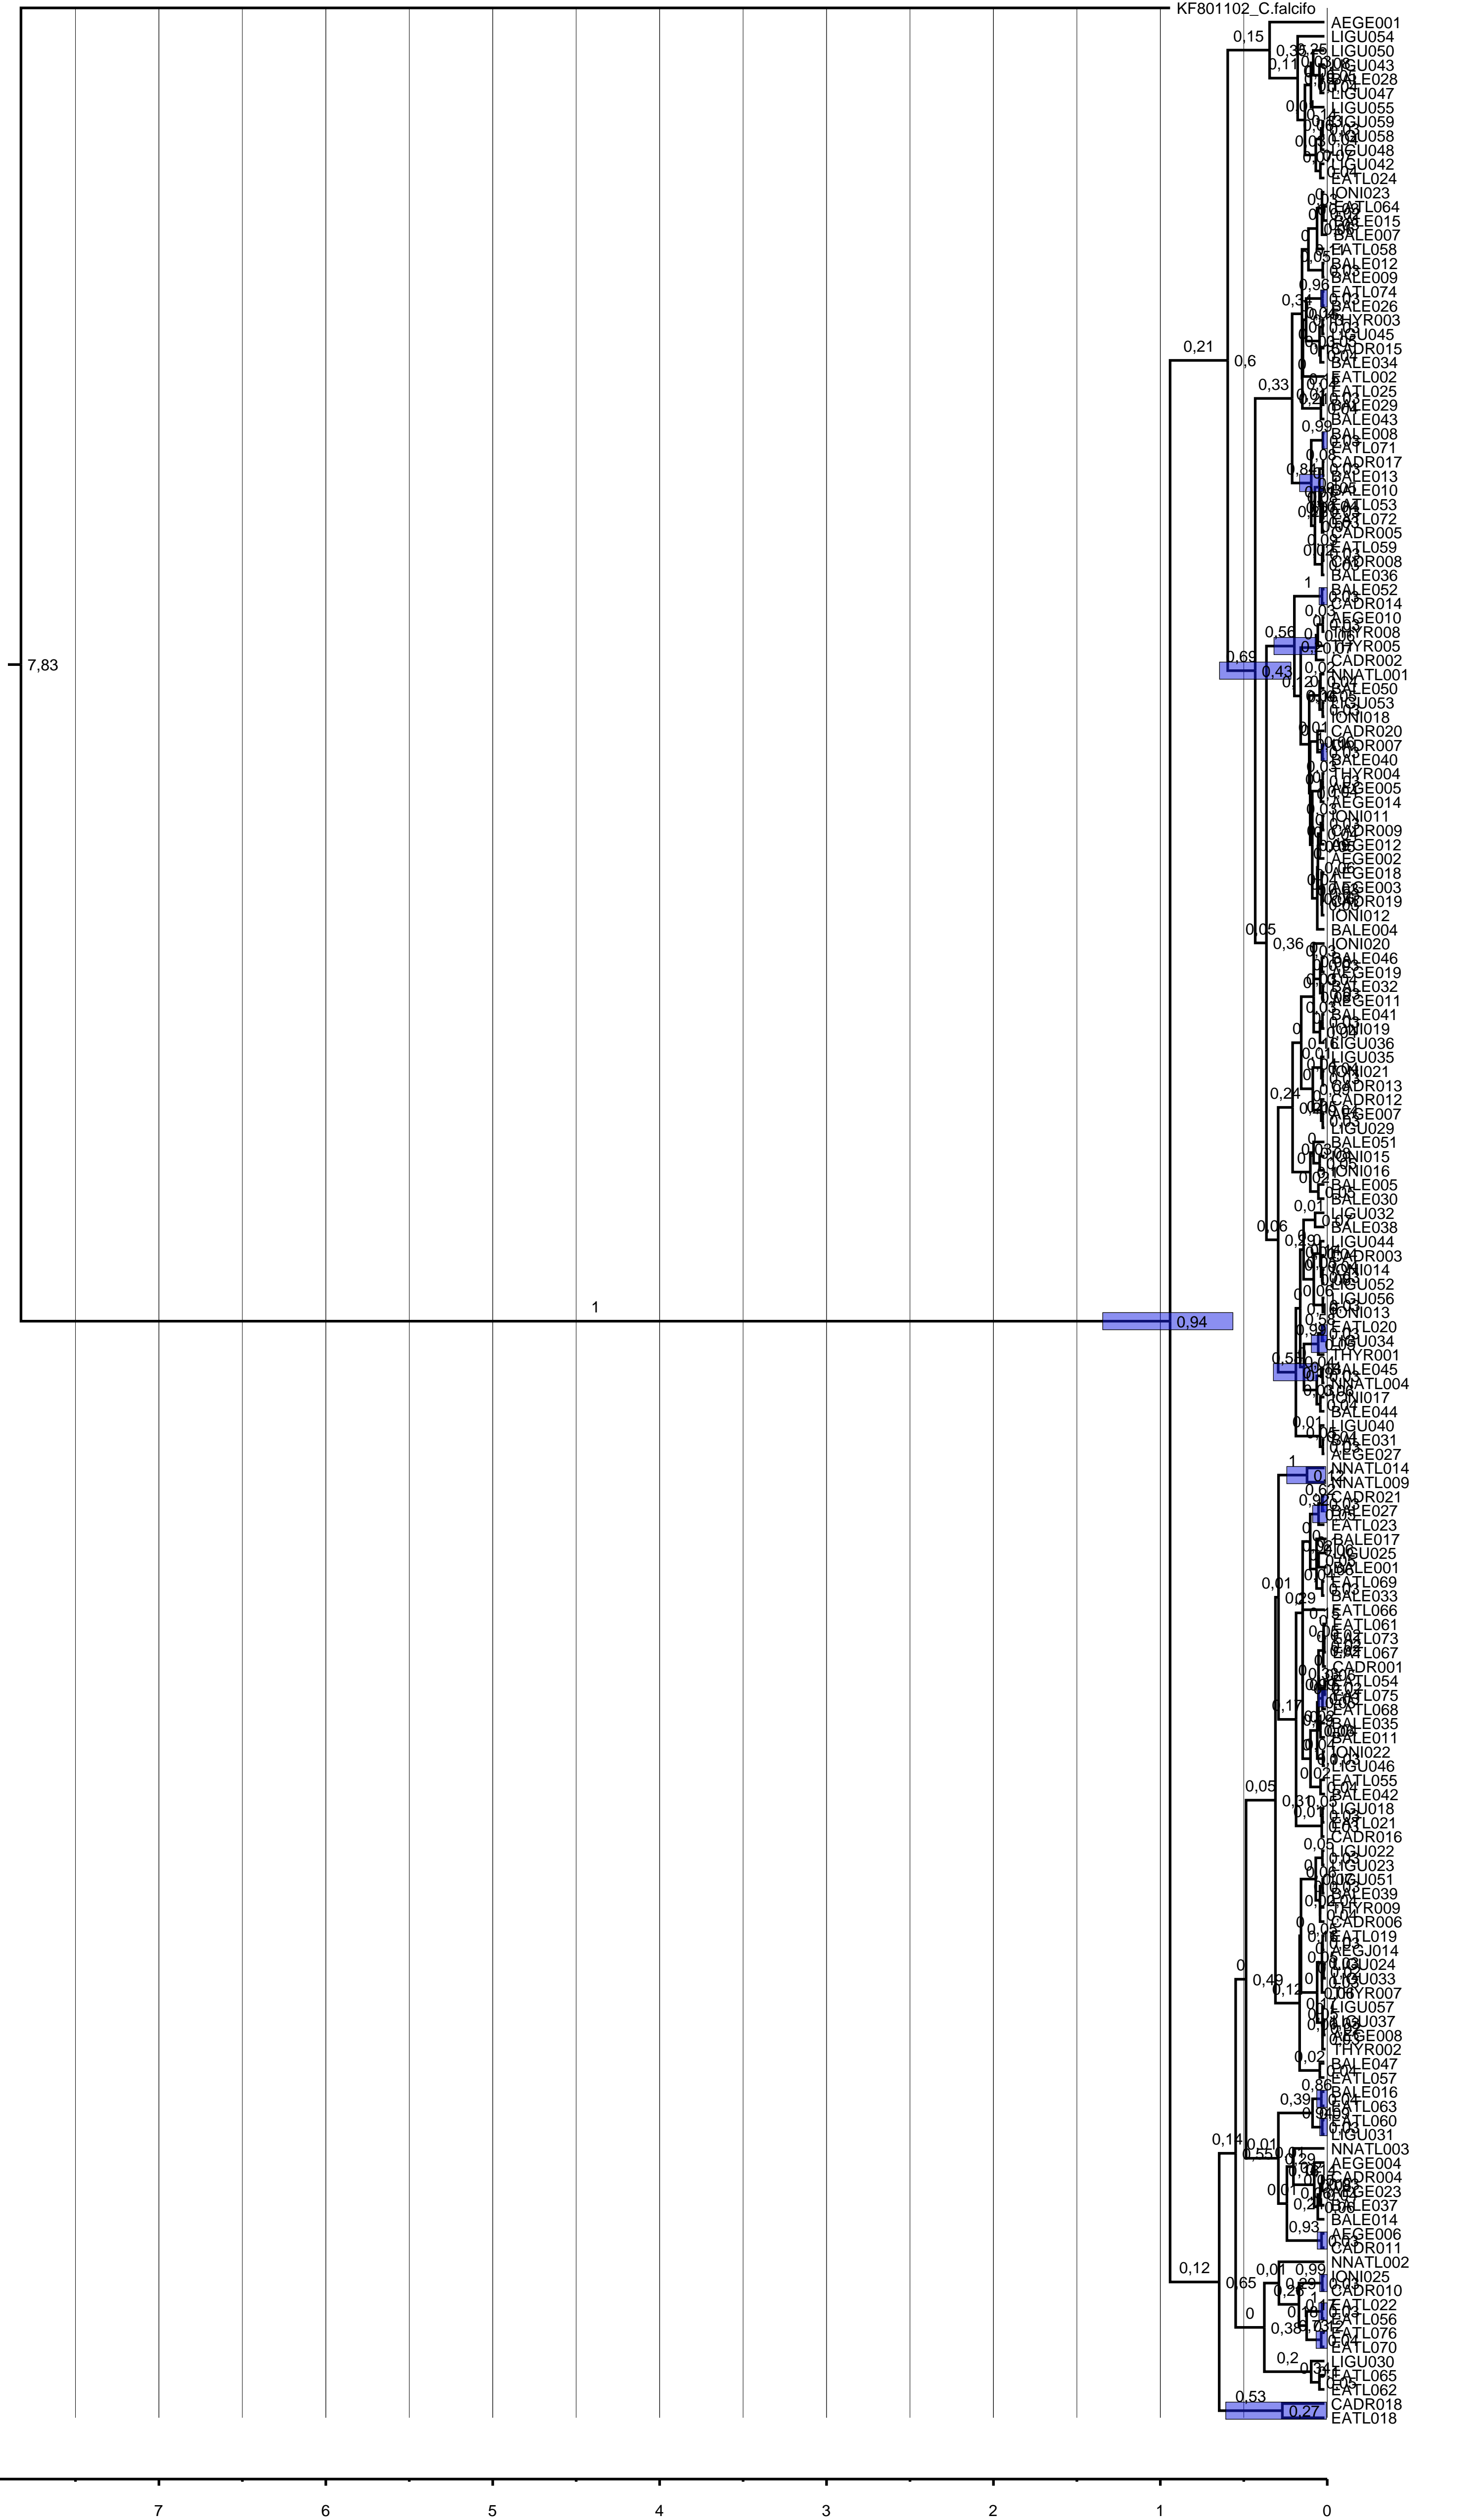

7.83

1

0.94

0.15

0.21

0.6

0.33

0.99

0.84

0.98

0.56

0.69

0.43

0.01

0.01

0.01

0.01

0.05

0.36

0.01

0.01

0.01

0.01

0.01

0.01

0.01

0.01

0.01

0.01

0.01

0.01

0.01

0.01

0.01

0.01

0.01

0.01

0.01

0.01

0.01

0.01

0.01

0.01

0.01

0.01

0.01

0.01

0.01

0.01
